# Supplementary material for: Molecular Screening for Digital Dermatitis-Associated Treponemes in Bovine Ischaemic Teat Necrosis Lesions and Milk in Dairy Cattle
Source: MDPI journal article supplement (doi:10.3390/pathogens13050427), 2024-05-17
Supplement: s1 [file s1]

## Supplementary Material

**Supplementary Table S1.** Validation results for the DD treponeme PCR assays using the samples obtained in the pilot study.

| Pilot study samples | <i>Treponema</i> genus | Group 1 | Group 2 | Group 3 |
|---------------------|------------------------|---------|---------|---------|
| 1                   | +                      | +       | +       | +       |
| 2                   | +                      | -       | +       | +       |
| 3                   | +                      | -       | +       | +       |
| 4                   | +                      | -       | +       | -       |
| 5                   | +                      | +       | +       | +       |
| 6                   | +                      | +       | +       | -       |
| 7                   | +                      | -       | +       | +       |
| 8                   | +                      | +       | +       | -       |
| 9                   | +                      | +       | +       | +       |
| 10                  | +                      | -       | +       | _*      |
| 11                  | +                      | +       | +       | -       |
| 12                  | -                      | -       | -       | -       |

+ indicates a positive case or animal, - indicates a negative case or animal, Group 1- DD *Treponema medium* phylogroup, Group 2 – DD *Treponema phagedenis* phylogroup, Group 3 – DD *Treponema pedis* phylogroup. \* - variation from the pilot study.
